# Supplementary material for: Tunable optical properties and stability of lead free all inorganic perovskites (Cs2SnIxCl6−x)
Source: Royal Society of Chemistry journal article supplement (doi:10.1039/c7ta10040j), 2018-01-01
Supplement: c7ta10040j1.pdf [file c7ta10040j1.pdf]

## Supporting information

### Tunable optical property and stability of lead free all inorganic perovskite ( $\text{Cs}_2\text{SnI}_{6-x}\text{Cl}_x$ )

Weiguang Zhu,<sup>a</sup> Guoqing Xin,<sup>a</sup> Yiping Wang<sup>b</sup>, Xin Min<sup>c</sup>, Tiankai Yao,<sup>a</sup> Wenqian Xu<sup>d</sup>, Minghao Fang<sup>c</sup>, Shufei Shi<sup>e,f</sup>, Jian Shi<sup>b</sup>, and Jie Lian<sup>a,\*</sup>

<sup>a</sup> Department of Mechanical, Aerospace and Nuclear Engineering, Rensselaer Polytechnic Institute, Troy, New York 12180, USA. Email: [lianj@rpi.edu](mailto:lianj@rpi.edu); Tel: 518-276-6081; Fax: 518-276-6025

<sup>b</sup> Department of Materials Science and Engineering, Rensselaer Polytechnic Institute, Troy, New York 12180, USA

<sup>c</sup> Beijing Key Laboratory of Materials Utilization of Nonmetallic Minerals and Solid Wastes, National Laboratory of Mineral Materials, School of Materials Science and Technology, China University of Geosciences (Beijing), Beijing 100083, PR China

<sup>d</sup> X-ray Science Division, Advanced Photon Source, Argonne National Laboratory, Lemont, Illinois 60439, USA

<sup>e</sup> Department of Chemical and Biological Engineering, Rensselaer Polytechnic Institute, Troy, New York 12180, USA

<sup>f</sup> Department of Electrical, Computer and Systems Engineering, Rensselaer Polytechnic Institute, Troy, New York 12180, USA

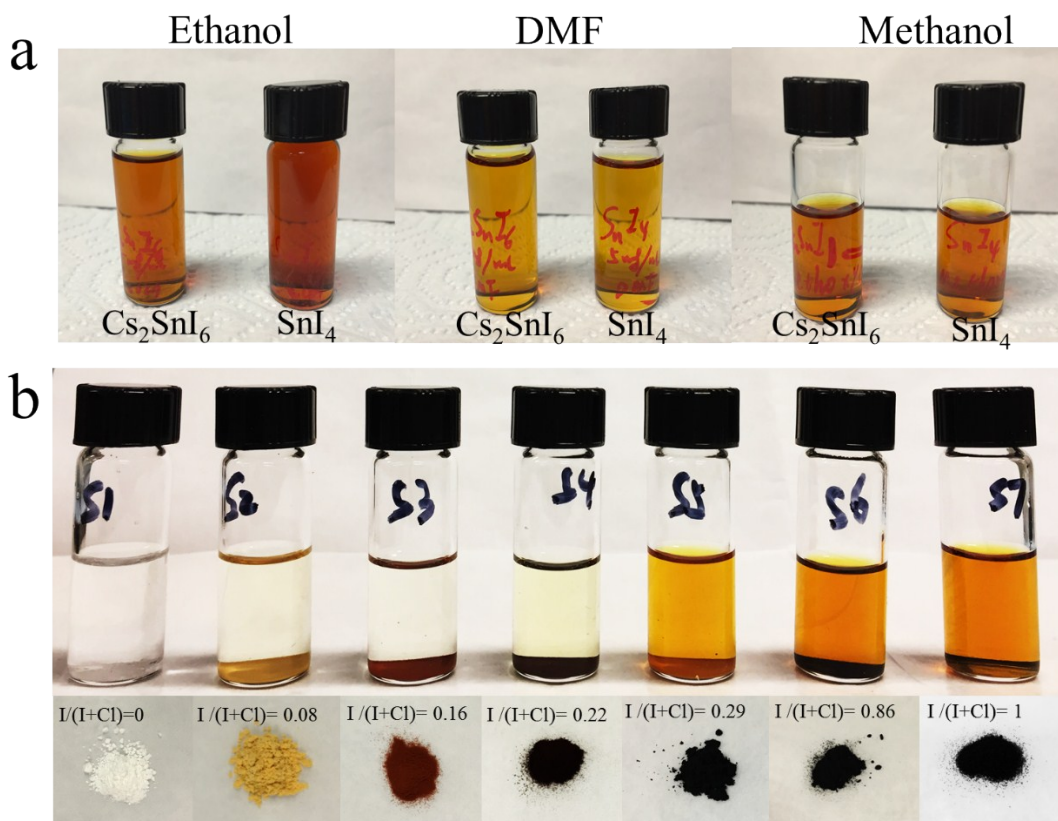

**Fig. S1** (a)  $\text{Cs}_2\text{SnI}_6$  and  $\text{SnI}_4$  were dissolved in ethanol, Dimethylformamide (DMF) and methanol, respectively. (b)  $\text{Cs}_2\text{SnI}_x\text{Cl}_{6-x}$  perovskite in ethanol solution. The corresponding powder is shown under each vial. The concentration is 5 mg/mL.

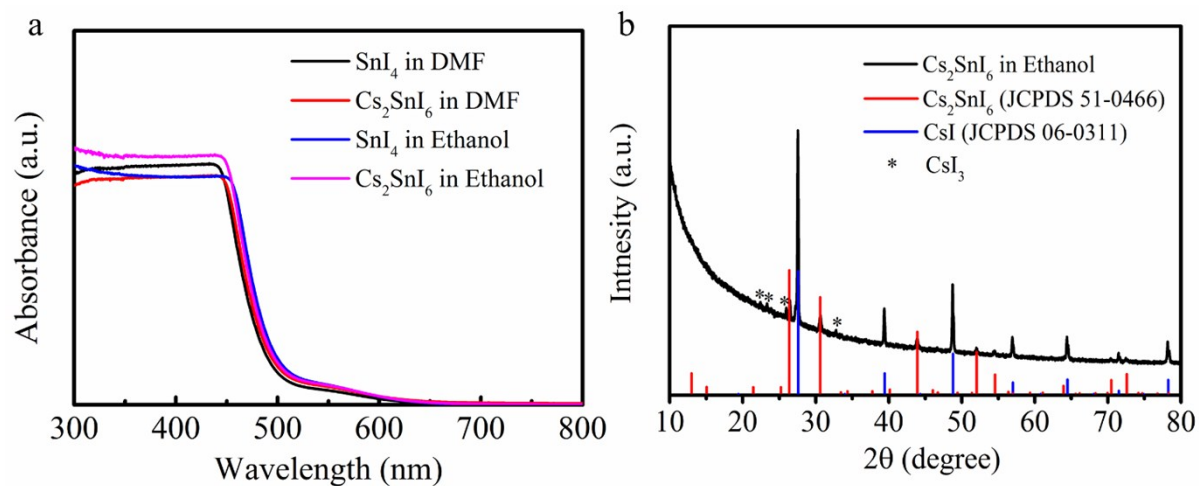

**Fig. S2** (a) UV-vis absorption spectra of  $\text{Cs}_2\text{SnI}_6$  and  $\text{SnI}_4$  in DMF and Ethanol solution, respectively. (b) XRD pattern of  $\text{Cs}_2\text{SnI}_6$  in Ethanol solution dried at 60 °C.

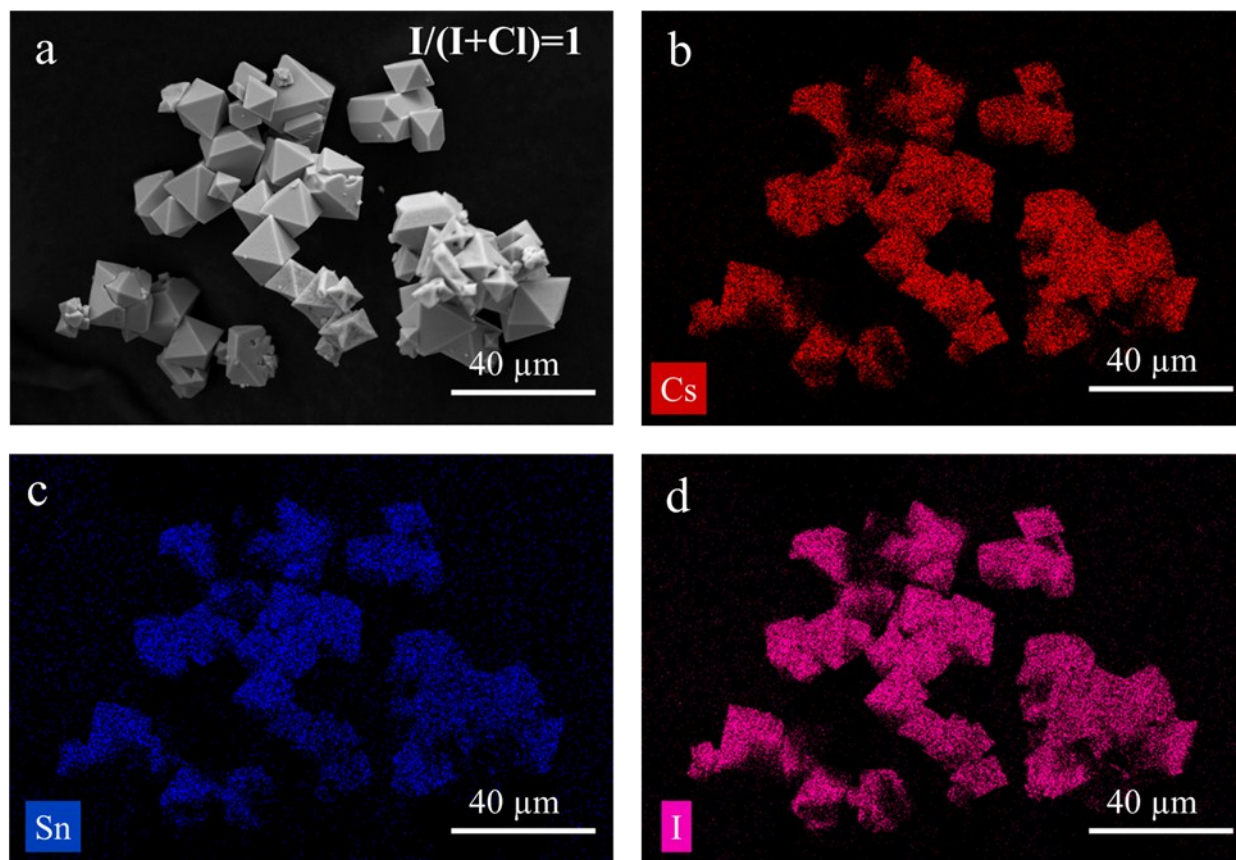

**Fig. S3** (a) SEM image of the sample S7 ( $\text{Cs}_2\text{SnI}_6$ ), (b) Cs map, (c) Sn map, (d) I map.



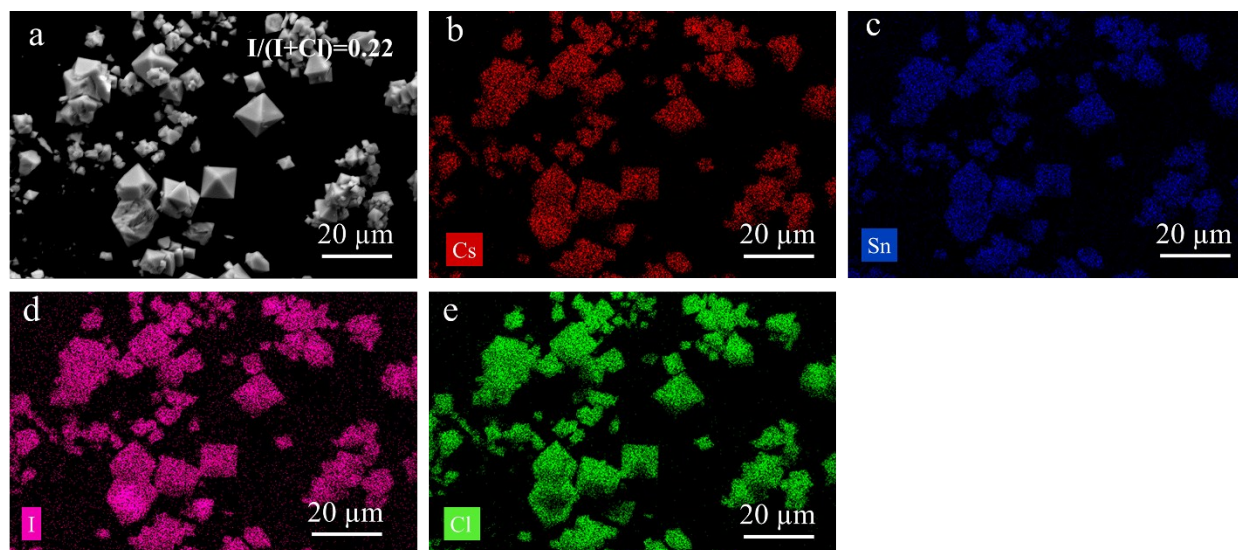

**Fig. S4** (a) SEM image of the sample S4, (b-e) the corresponding elemental mappings of Cs, Sn, I and Cl, respectively.

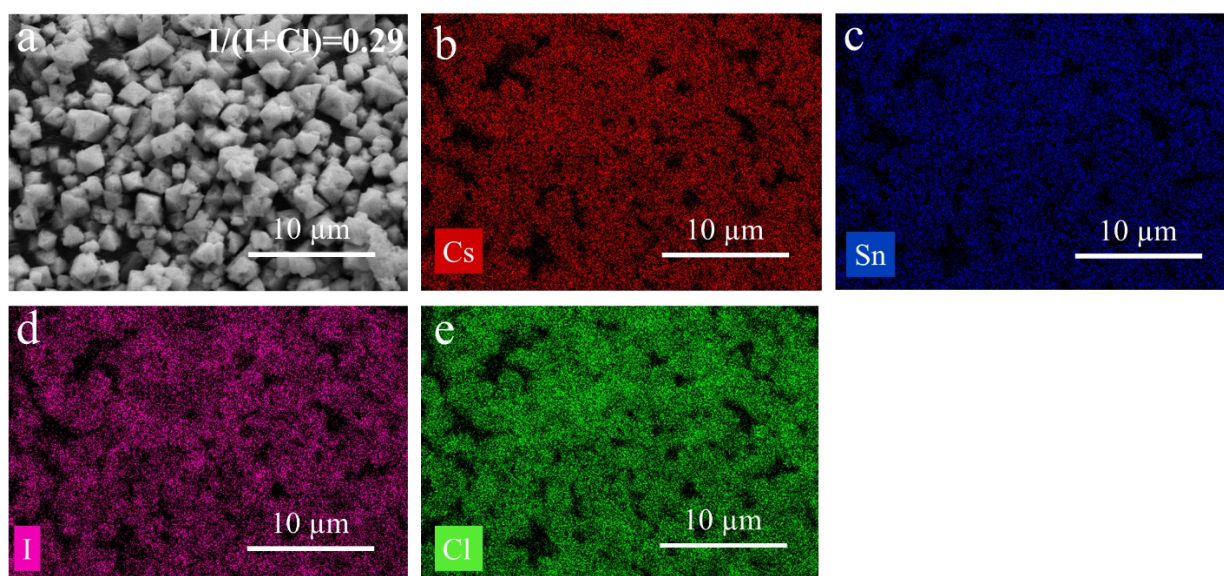

**Fig. S5** (a) SEM image of sample S5, (b-e) the corresponding elemental mapping of Cs, Sn, I and Cl, respectively.

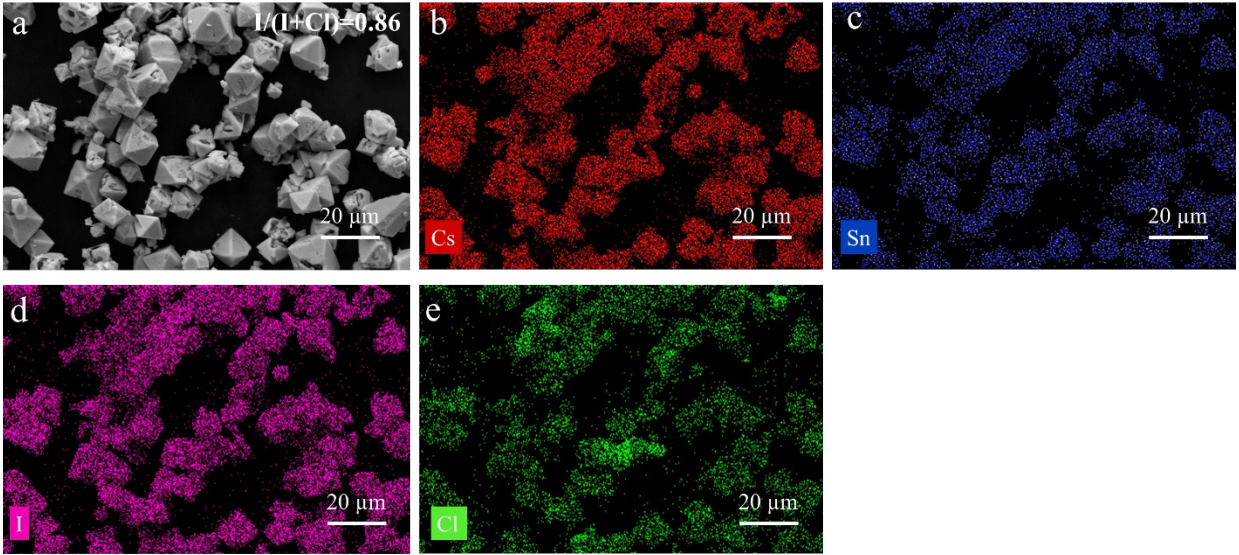

**Fig. S6** (a) SEM image of sample S6, (b-e) the corresponding elemental mapping of Cs, Sn, I and Cl, respectively.

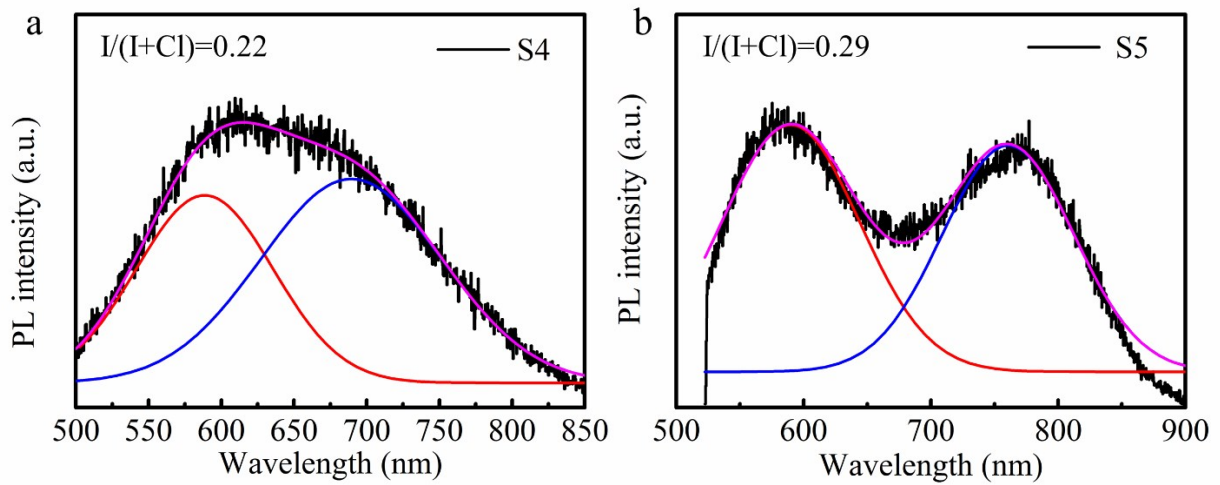

**Fig. S7** Multi-peak fitting of PL spectra at room temperature for sample (a) S4 and (b) S5. The bandgaps of these peaks are identified for S4 (2.11 eV and 1.82 eV) and S5 (2.08 eV and 1.63 eV), respectively.



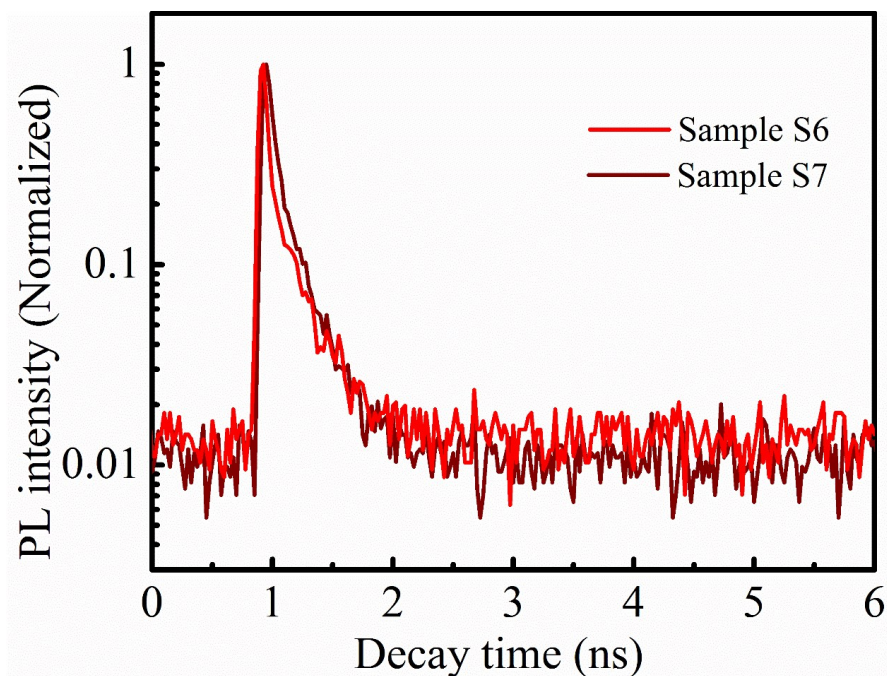

**Fig. S8** Time-resolved photoluminescence measured at room temperature for sample S6 ( $\text{Cs}_2\text{SnI}_{5.28}\text{Cl}_{0.72}$ ) and S7 ( $\text{Cs}_2\text{SnI}_6$ ).

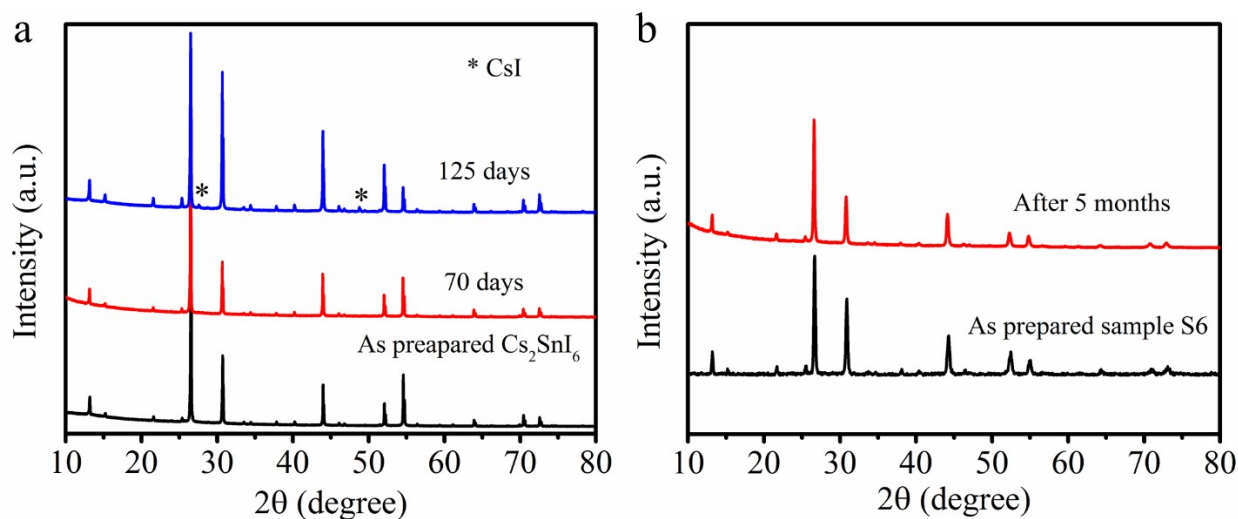

**Fig. S9** (a) XRD patterns of the sample S7 ( $\text{Cs}_2\text{SnI}_6$ ) stored at ambient condition for 0, 70 and 125 days, (b) XRD patterns of the sample S6 ( $\text{Cs}_2\text{SnI}_{5.28}\text{Cl}_{0.72}$ ) stored at ambient condition for 0 day and 5 months.

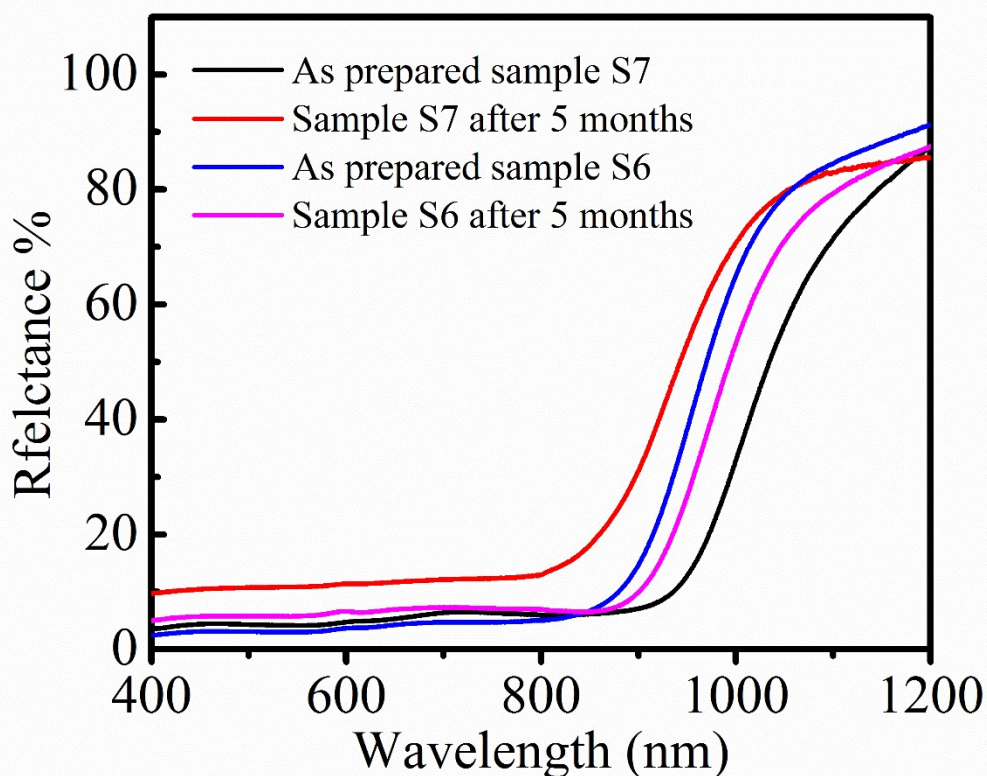

**Fig. S10** UV-vis diffuse reflectance spectra of sample S7 ( $\text{Cs}_2\text{SnI}_6$ ) and S6 ( $\text{Cs}_2\text{SnI}_{5.28}\text{Cl}_{0.72}$ ) as prepared and after 5 months, respectively.

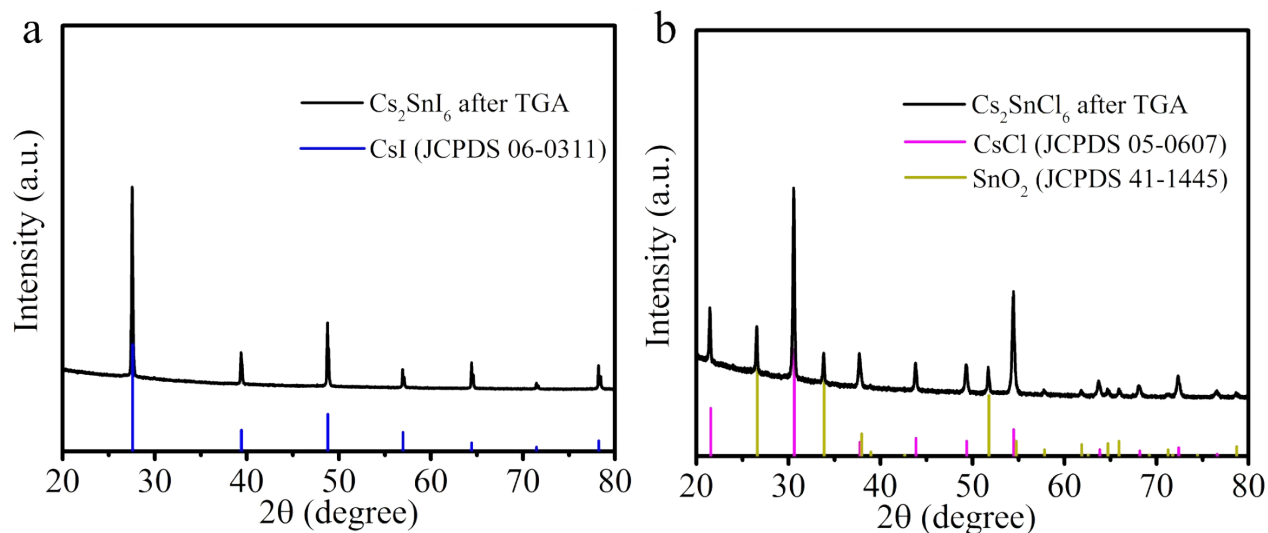

**Fig. S11** (a) the XRD patterns for  $\text{Cs}_2\text{SnI}_6$  sample after TGA measurement. All peaks can be matched to the standard file JCPDS 06-0311 of CsI. (b) the XRD pattern for the residual of  $\text{Cs}_2\text{SnCl}_6$  sample after TGA test. All peaks can be matched to the standard files of CsCl (JCPDS 05-0607) and  $\text{SnO}_2$  (JCPDS 41-1445).

**Table S1** Structure parameters and refinement statistics for  $\text{Cs}_2\text{SnI}_x\text{Cl}_{6-x}$  from Rietveld refinement of synchrotron X-ray powder diffraction data

| Sample                                    | S1             | S2         | S3         | S4         |            |                 | S5         |            | S6         | S7         |
|-------------------------------------------|----------------|------------|------------|------------|------------|-----------------|------------|------------|------------|------------|
| stoichiometric x                          | 0              | 0.43       | 0.90       | 0.69       | 1.3        | 5.21            | 0.44       | 5.36       | 5.28       | 6          |
| a (Å)                                     | 10.3923<br>(2) | 10.5561(2) | 10.6741(1) | 10.6310(5) | 10.7620(5) | 11.5503<br>(23) | 10.5255(4) | 11.6097(3) | 11.5870(2) | 11.6517(2) |
| Phase fraction (%)                        | 100            | 100        | 100        | 48.9       | 49.5       | 1.6             | 61.1       | 38.9       | 100        | 100        |
| Cl/I (x, 0, 0)                            | 0.2320(2)      | 0.2368(2)  | 0.2406(2)  | 0.2404(4)  | 0.2407(4)  | 0.2378(39)      | 0.2384(4)  | 0.2462(3)  | 0.2450(2)  | 0.2450(1)  |
| $U_{\text{iso}}$ (Cs) (Å <sup>2</sup> )   | 0.0275(9)      | 0.0532(7)  | 0.0663(8)  | 0.0485(14) | 0.0846(22) | 0.076(48)       | 0.0451(15) | 0.0557(32) | 0.0546(17) | 0.0240(13) |
| $U_{\text{iso}}$ (Sn) (Å <sup>2</sup> )   | 0.0414(7)      | 0.0365(9)  | 0.0435(9)  | 0.0316(17) | 0.0477(23) | 0.047(40)       | 0.0319(19) | 0.0338(30) | 0.0324(18) | 0.0423(10) |
| $U_{\text{iso}}$ (Cl/I) (Å <sup>2</sup> ) | 0.0451(11)     | 0.0527(14) | 0.0623(12) | 0.0484(21) | 0.0651(24) | 0.093(25)       | 0.0498(26) | 0.0393(13) | 0.0395(7)  | 0.0351(5)  |
| RF <sup>2</sup> (%)                       | 4.23           | 3.86       | 5.65       | 4.42       | 3.93       | 8.36            | 3.42       | 2.96       | 5.27       | 5.24       |
| R <sub>wp</sub> (%)                       | 4.39           | 4.63       | 4.68       |            | 3.88       |                 |            | 5.70       | 7.90       | 6.62       |
| GOF                                       | 4.33           | 4.05       | 4.61       |            | 3.62       |                 |            | 5.48       | 7.31       | 5.68       |

Note. Sample S4 has three phases, two major phases with close compositions and a third I-rich phase.

Sample S5 has two phases with I- and Cl-enriched compositions.
